# Supplementary material for: Fe-doped phosphorene for the nitrogen reduction reaction
Source: Royal Society of Chemistry journal article supplement (doi:10.1039/c8ta03989e), 2018-01-01
Supplement: c8ta03989e1.pdf [file c8ta03989e1.pdf]

**Table S1.** The special bond length of P-P bond and P-Fe bond of Fe-P.

| <b>Bond</b>                    | <b>Length (Å)</b> | <b>Bond</b>                      | <b>Length (Å)</b> |
|--------------------------------|-------------------|----------------------------------|-------------------|
| Fe-P <sub>1</sub>              | 2.39              | P <sub>3</sub> -P <sub>4</sub>   | 2.23              |
| Fe-P <sub>2</sub>              | 2.08              | P <sub>4</sub> -P <sub>5</sub>   | 2.23              |
| Fe-P <sub>4</sub>              | 2.16              | P <sub>4</sub> -P <sub>7</sub>   | 2.96              |
| Fe-P <sub>6</sub>              | 2.08              | P <sub>5</sub> -P <sub>6</sub>   | 2.20              |
| Fe-P <sub>7</sub>              | 2.12              | P <sub>7</sub> -P <sub>8</sub>   | 2.23              |
| P <sub>1</sub> -P <sub>2</sub> | 2.27              | P <sub>7</sub> -P <sub>11</sub>  | 2.23              |
| P <sub>1</sub> -P <sub>6</sub> | 2.31              | P <sub>8</sub> -P <sub>9</sub>   | 2.27              |
| P <sub>2</sub> -P <sub>3</sub> | 2.20              | P <sub>10</sub> -P <sub>11</sub> | 2.26              |

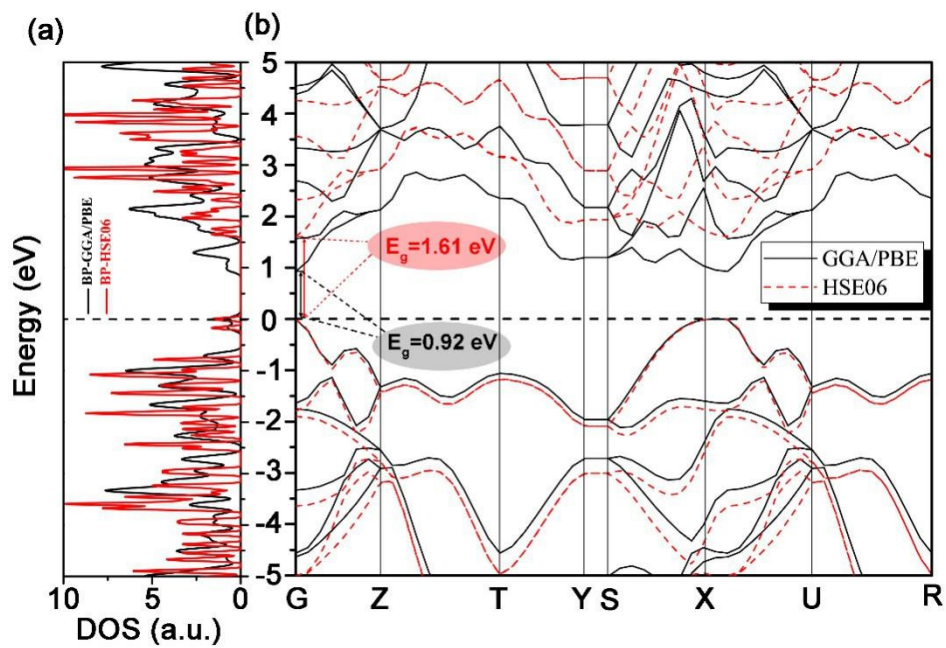

**Figure S1.** Density of states (a) and band structure (b) of P. Both the GGA and HSE06 functionals were used to calculate the electronic properties. The Fermi level is set to zero.

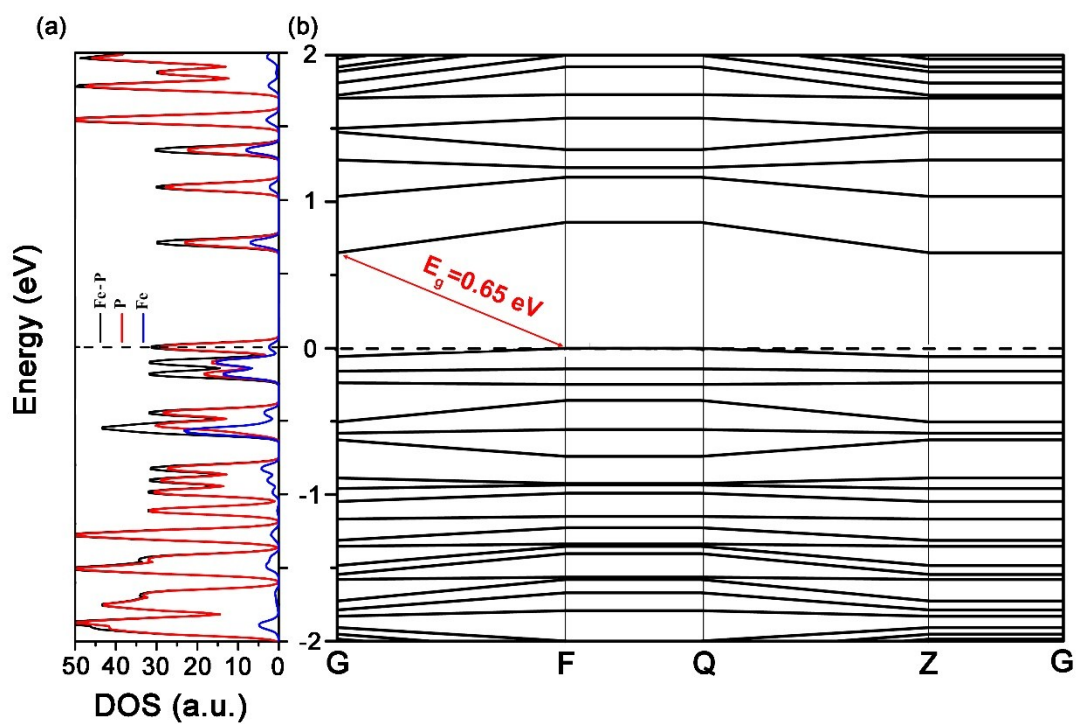

**Figure S2.** Density of states (a) and band structure (b) of Fe-P. The same electronic properties of Fe-P in both GGA and HSE06 functionals. The Fermi level is set to zero.

**Table S2.** The Mulliken population analysis of Fe-P.

| <b>Atom</b> | <b>Charges (e)</b> | <b>atom</b> | <b>Charges (e)</b> |
|-------------|--------------------|-------------|--------------------|
| Fe          | 0.18               | P6          | 0.03               |
| P1          | -0.12              | P7          | -0.07              |
| P2          | 0.04               | P8          | -0.03              |
| P3          | 0.03               | P9          | 0.00               |
| P4          | -0.07              | P10         | 0.00               |
| P5          | 0.03               | P11         | -0.03              |

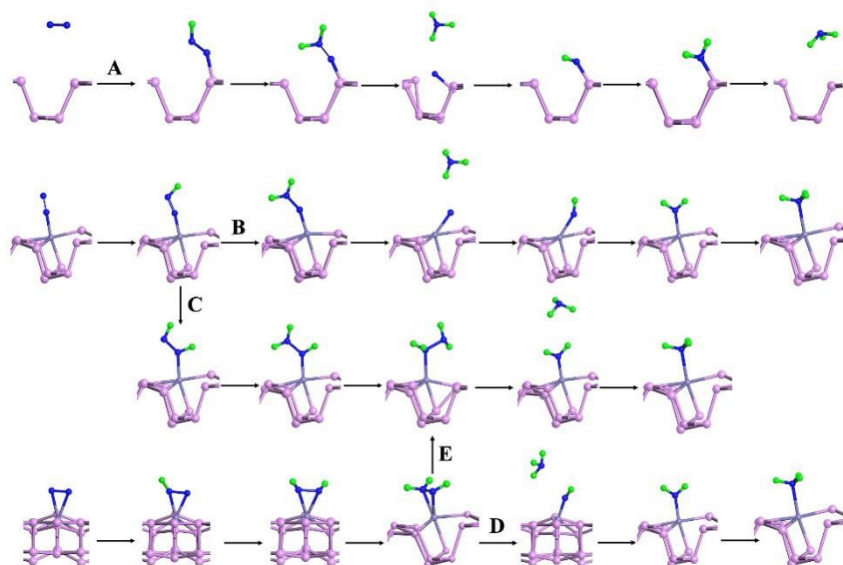

**Figure S3.** The optimized structures of each step in the Dis-P (A), Dis-Fe-P (B), Alt-Fe-P (C), Enz<sup>1</sup>-Fe-P (D), and Enz<sup>2</sup>-Fe-P (E) pathways, respectively.

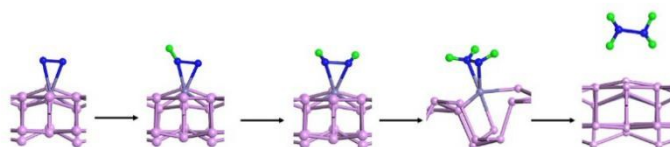

**Figure S4.** The optimized structures of each step in the emission of the intermediate product  $\text{N}_2\text{H}_4$ , respectively.

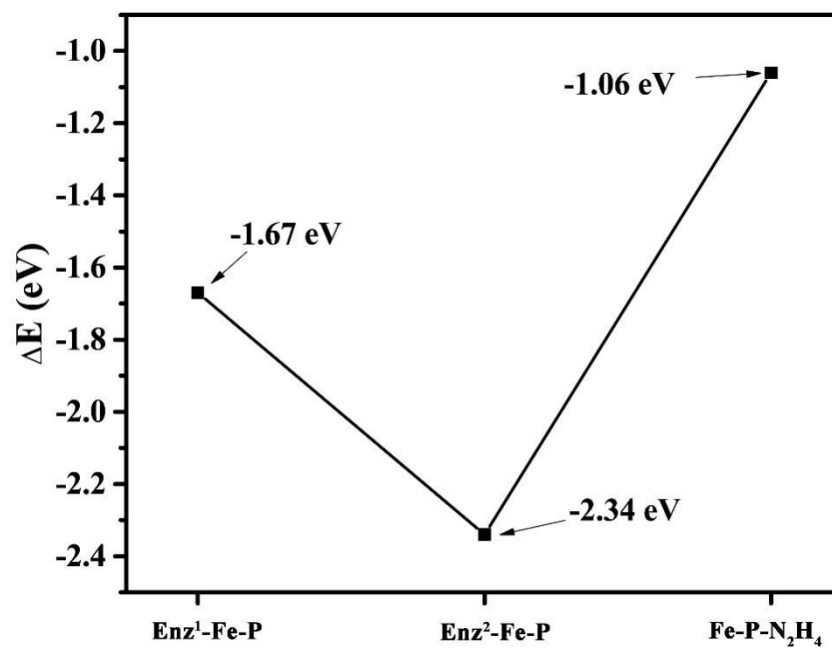

**Figure S5.** Reaction energy of the fifth step in the Enz pathway, which converted  $\text{NH}_2\text{-NH}^*$  to  $\text{NH}_2\text{-NH}_2$ ,  $\text{NH}^*+\text{NH}_3$  and  $\text{H}_2\text{N-H}_2\text{N}^*$ , respectively.

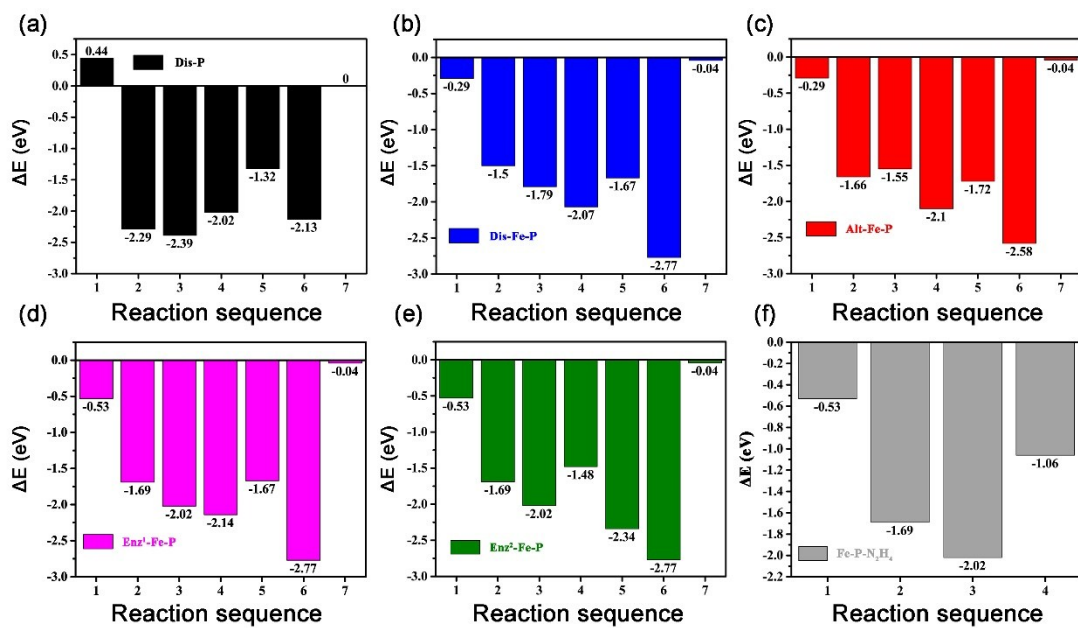

**Figure S6.** The reaction energies in each step (a) Dis-P, (b) Dis-Fe-P, (c) Alt-Fe-P, (d) Enz<sup>1</sup>-Fe-P, (e) Enz<sup>2</sup>-Fe-P, respectively.



**Table S3.** The N-N bond length (Å) of the adsorbed N<sub>2</sub> in the various reaction pathways (Dis-P, Dis-Fe-P, Alt-Fe-P, Enz<sup>1</sup>-Fe-P and Enz<sup>2</sup>-Fe-P, respectively)

| <b>steps</b>           | <b>0</b> | <b>1</b> | <b>2</b> | <b>3</b> | <b>4</b> | <b>5</b> | <b>6</b> |
|------------------------|----------|----------|----------|----------|----------|----------|----------|
| Dis-P                  | 1.15     | 1.15     | 1.32     | 1.42     | 3.52     | --       | --       |
| Dis-Fe-P               | 1.15     | 1.17     | 1.24     | 1.30     | 3.46     | --       | --       |
| Alt-Fe-P               | 1.15     | 1.17     | 1.24     | 1.29     | 1.36     | 1.48     | 3.75     |
| Enz <sup>1</sup> -Fe-P | 1.15     | 1.19     | 1.26     | 1.36     | 1.41     | 1.48     | 3.75     |
| Enz <sup>2</sup> -Fe-P | 1.15     | 1.19     | 1.26     | 1.36     | 1.41     | 3.75     | --       |

**Table S4.** The Mulliken charge of the three moieties (mole is equal to molecule, P, Fe, respectively)

| steps | Dis-P |       | Dis-Fe-P |       |       | Alt-Fe-P |       |      | Enz <sup>1</sup> -Fe-P |       |      | Enz <sup>2</sup> -Fe-P |       |      |
|-------|-------|-------|----------|-------|-------|----------|-------|------|------------------------|-------|------|------------------------|-------|------|
|       | mol   | P     | mol      | P     | Fe    | mol      | P     | Fe   | mol                    | P     | Fe   | mol                    | P     | Fe   |
| 1     | 0.00  | -0.02 | -0.23    | 0.3   | -0.23 | -0.23    | -0.08 | 0.3  | -0.24                  | -0.05 | 0.26 | -0.24                  | -0.05 | 0.26 |
| 2     | -0.59 | 0.59  | -0.24    | 0.38  | -0.24 | -0.24    | -0.14 | 0.38 | -0.28                  | -0.15 | 0.42 | -0.28                  | -0.15 | 0.42 |
| 3     | -0.66 | 0.65  | -0.13    | -0.21 | 0.33  | -0.2     | -0.18 | 0.39 | -0.51                  | 0.1   | 0.41 | -0.51                  | 0.1   | 0.41 |
| 4     | -1.12 | 1.14  | -0.83    | 0.44  | 0.4   | -0.04    | -0.34 | 0.38 | -0.03                  | -0.31 | 0.33 | -0.03                  | -0.31 | 0.33 |
| 5     | -0.72 | 0.71  | -0.73    | 0.39  | 0.34  | 0.04     | -0.31 | 0.27 | -0.27                  | -0.07 | 0.39 | 0.04                   | -0.31 | 0.27 |
| 6     | -0.26 | 0.24  | -0.3     | -0.12 | 0.44  | -0.27    | -0.07 | 0.39 | -0.3                   | -0.12 | 0.44 | -0.27                  | -0.07 | 0.39 |
| 7     | -0.02 | -0.08 | 0.07     | -0.34 | 0.29  | -0.05    | -0.16 | 0.19 | 0.07                   | -0.34 | 0.29 | -0.05                  | -0.16 | 0.19 |

in the five reaction pathways.
